# Supplementary material
Source: PubMed Central journal article supplement (PMC6545111)

## Supporting Information

Discovery of QCA570 as an Exceptionally Potent and Efficacious Proteolysis  
Targeting Chimera (PROTAC) Degradator of the Bromodomain and Extra-Terminal  
(BET) Proteins Capable of Inducing Complete and Durable Tumor Regression

*Chong Qin<sup>†++</sup>, Yang Hu<sup>†++</sup>, Bing Zhou<sup>†++</sup>, Ester Fernandez-Salas<sup>†^±</sup>, Chao-Yie  
Yang<sup>†+</sup>, Liu Liu<sup>†+</sup>, Donna McEachern<sup>†+</sup>, Sally Przybranowski<sup>†+</sup>, Mi Wang<sup>†+</sup>, Jeanne  
Stuckey<sup>#</sup>, Jennifer Meagher<sup>#</sup>, Longchuan Bai<sup>†+</sup>, Zhuo Chen<sup>†+</sup>, Mei Lin<sup>†+</sup>, Jiuling  
Yang<sup>†+¶</sup>, Danya N. Ziazadeh<sup>†+</sup>, Fuming Xu<sup>†+</sup>, Jiantao Hu<sup>†+</sup>, Weiguo Xiang<sup>†+</sup>, Liyue  
Huang<sup>†+</sup>, Siwei Li<sup>Δ</sup>, Bo Wen<sup>Δ</sup> and Duxin Sun<sup>Δ</sup>, Shaomeng Wang<sup>†+¶§\*</sup>*

<sup>†</sup>The Rogel Cancer Center, Departments of <sup>+</sup>Internal Medicine, <sup>¶</sup>Pharmacology,  
<sup>§</sup>Medicinal Chemistry, and <sup>^</sup>Pathology, University of Michigan Medical School, <sup>#</sup>Life  
Sciences Institute, <sup>Δ</sup>Pharmacokinetics Core, College of Pharmacy, University of  
Michigan, Ann Arbor, Michigan 48109, United States.

## **Contents of Supporting Information:**

**Figure S1.** Western blotting analysis of BRD2, BRD3, and BRD4 proteins in RS4;11 cells treated with BET inhibitor **22**, compound **26** and BET degraders **27, 28, 29, 30**, and **31**.

**Figure S2.** Western blotting analysis of GSPT1 proteins in RS4;11 cells treated with BET degrader **35**.

**Figure S3.**  $^1\text{H}$  NMR spectrum of compound **35**.

**Figure S4.**  $^{13}\text{C}$  NMR spectrum of compound **35**.

**Figure S5.** UPLC-MS chromatogram of compound **35**.

**Figure S1.** Related to Figure 3. Western blotting analysis of BRD2, BRD3, and BRD4 proteins in RS4;11 cells treated with BET inhibitor **22**, compound **26** and BET degraders **27**, **28**, **29**, **30**, and **31**. RS4;11 cells were treated for 3 h with each individual compound at indicated concentrations. BET-BRD protein degradation was determined by western blot probed with specific antibodies. Decreased levels of c-Myc were used to determine the biological activity of each compound. GAPDH was used as loading control.

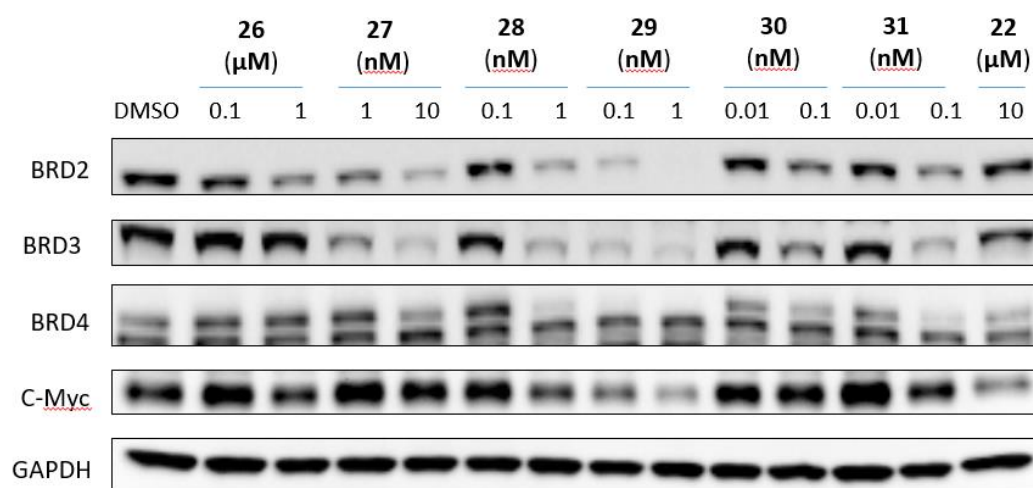

**Figure S2.** Western blotting analysis of GSPT1 proteins in RS4;11 cells treated with BET degrader **35**. RS4;11 and MV-4-11 cells were treated with BET degrader **35** (QCA570) and the corresponding BET inhibitor **22** (QCA276) at the indicated concentrations for 3 hours. Then cell lysates were analyzed by western blotting for protein level of GSPT1, probed with a specific GSPT1 polyclonal antibody (ab126090, Abcam). GAPDH was used as loading control.

**A. RS4;11 cells (t = 3 h)**

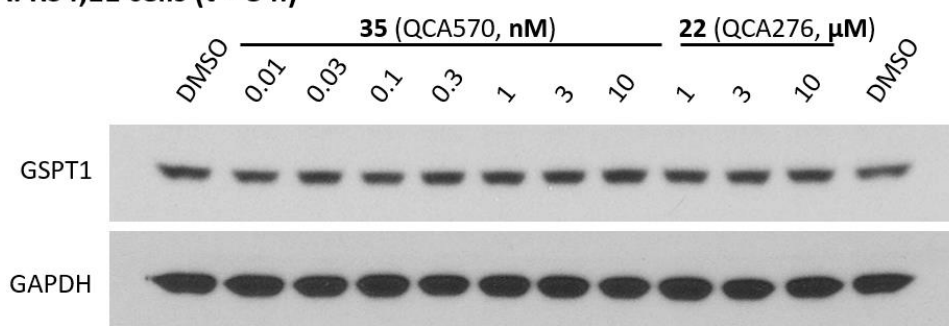

**B. MV-4-11 cells (t = 3 h)**

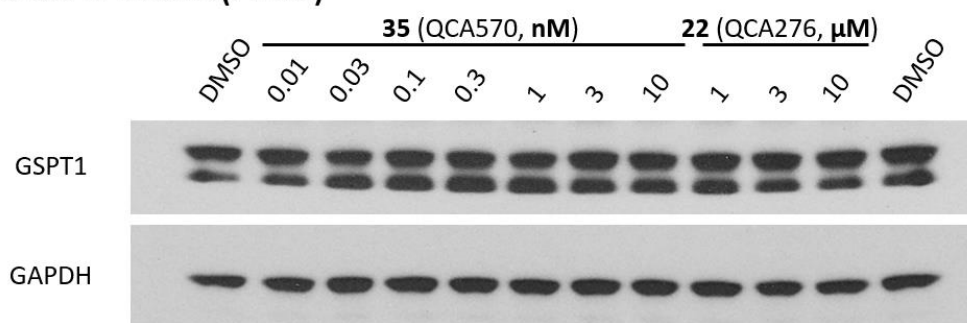

**Figure S3.**  $^1\text{H}$  NMR of **35**.

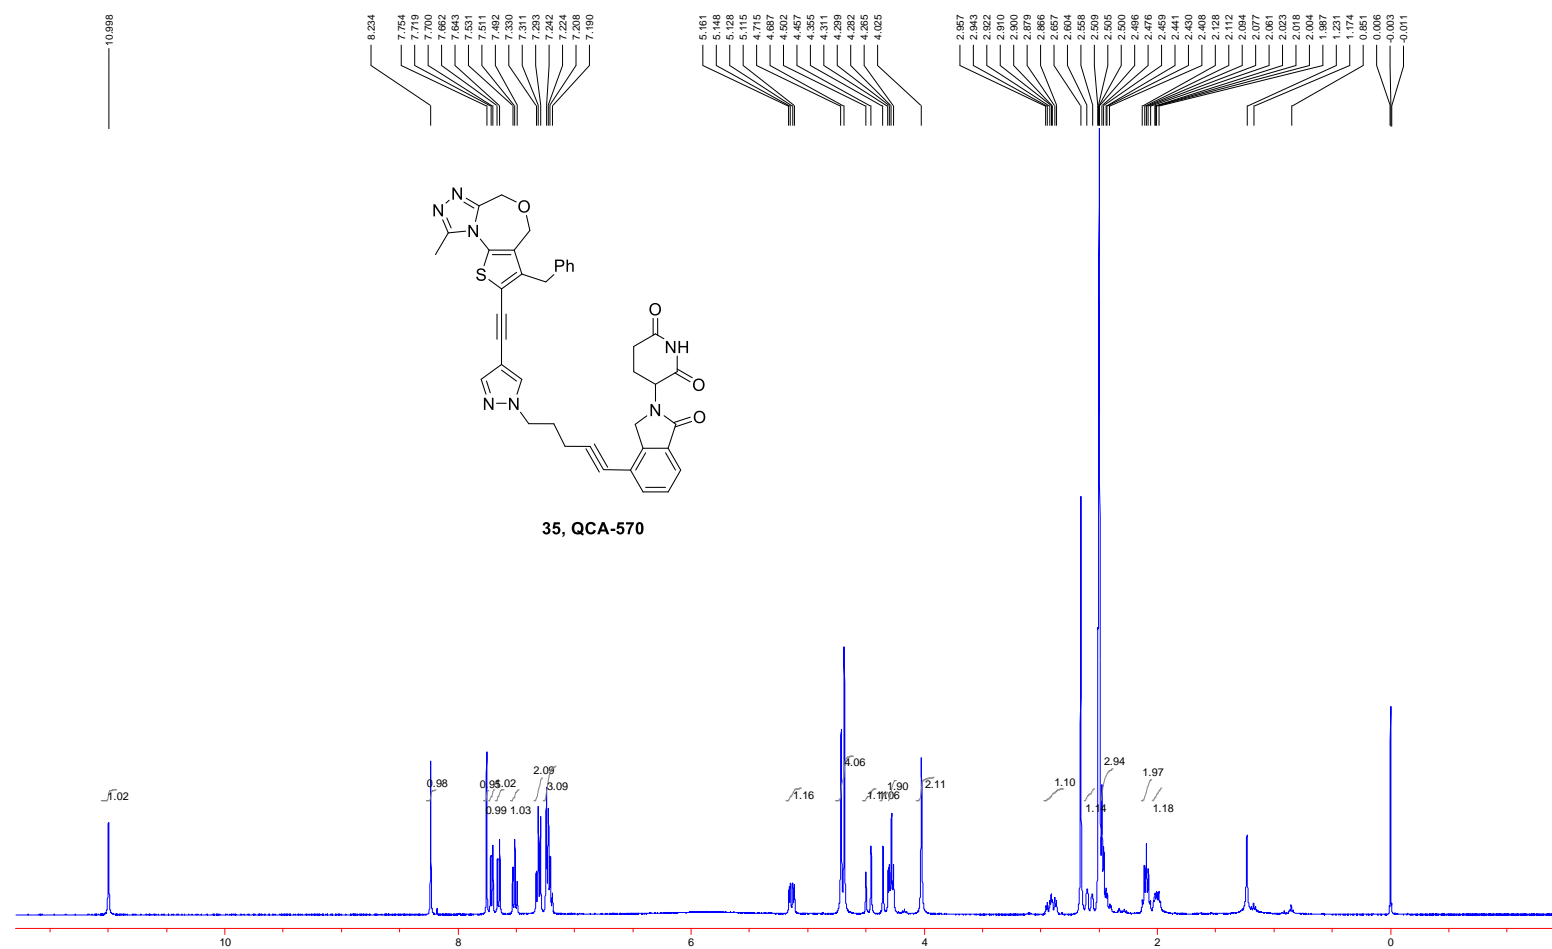

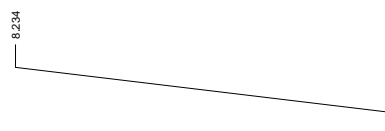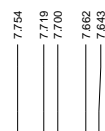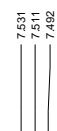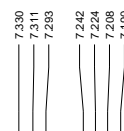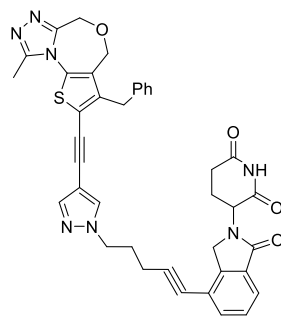

35, QCA-570

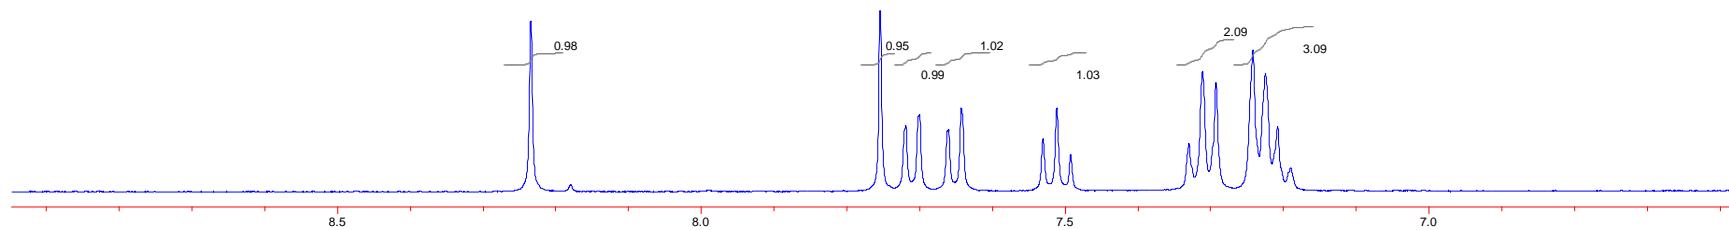

**35, QCA-570**

Cc1nc2c(ncn2C1Cc3ccccc3)c4sc(C#Cc5cn(CCC#Cc6c7ccccc7n(C(=O)OCC6=O)c8ccccc8)c5)c4

172.836  
170.926  
167.616  
162.279  
153.025  
150.540  
141.725  
143.860  
141.483  
138.195  
134.085  
133.779  
131.936  
131.506  
129.701  
129.614  
128.786  
128.654  
128.519  
128.460  
126.475  
122.704  
118.567  
115.568  
100.681  
94.772  
88.114  
80.689  
76.879  
67.445  
61.848  
51.589  
50.554  
46.970  
45.694  
40.129  
39.924  
39.717  
38.597  
38.299  
38.167  
38.089  
35.759  
33.137  
31.168  
30.741  
28.561  
27.446  
18.128  
12.215  
8.585

**Figure S5.** UPLC-MS results for compound **35**.

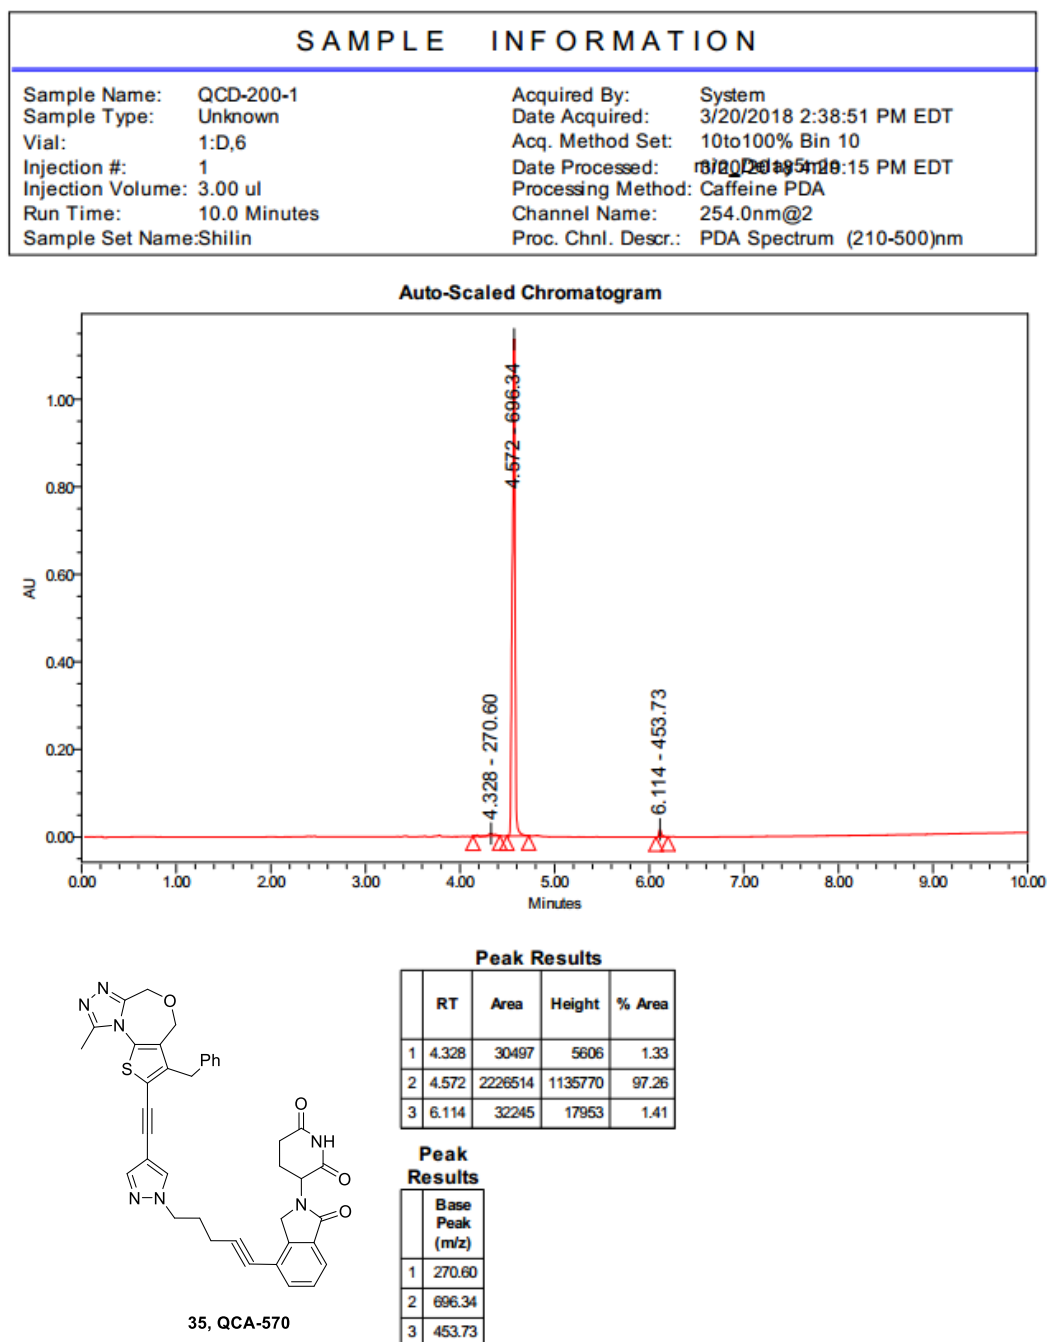

Supplement: NIHMS1016973-supplement-Supplemental.pdf [file NIHMS1016973-supplement-Supplemental.pdf]
